# Supplementary material for: Effect of Fatty Acid Amide Hydrolase Inhibitor URB597 on Orofacial Pain Perception in Rats
Source: MDPI journal article supplement (doi:10.3390/ijms23094665), 2022-04-23
Supplement: s1 [file s1]

**Supplementary Table S1.** Effect of control, electrical stimulation tooth pulp, and URB597 on the levels of SP, CGRP, and EM-2 mRNAs in mesencephalon, thalamus, and hypothalamus in rats. SP, CGRP and EM-2 mRNA levels are shown as relative quantity ( $2^{\Delta\Delta C_t}$ )  $\pm$  SEM.

| Signaling mediators | Brain structure | Control                   | Tooth pulp                | URB597                 | Control vs. Tooth pulp<br><i>p</i> - value | Control vs. URB597<br><i>p</i> - value | Tooth pulp vs. URB597<br><i>p</i> - value |
|---------------------|-----------------|---------------------------|---------------------------|------------------------|--------------------------------------------|----------------------------------------|-------------------------------------------|
| SP                  | mesencephalon   | 0.3488<br>$\pm$<br>0.0371 | 0.7007<br>$\pm$<br>0.0101 | 0.2702 $\pm$<br>0.0282 | <0.0001                                    | 0.1415                                 | <0.0001                                   |
|                     | thalamus        | 0.0052<br>$\pm$<br>0.0005 | 0.0068<br>$\pm$<br>0.0006 | 0.0043 $\pm$<br>0.0004 | 0.0819                                     | 0.4907                                 | 0.0086                                    |
|                     | hypothalamus    | 0.3103<br>$\pm$<br>0.0260 | 0.5847<br>$\pm$<br>0.0310 | 0.1842 $\pm$<br>0.0286 | <0.0001                                    | 0.0182                                 | <0.0001                                   |
| CGRP                | mesencephalon   | 0.2553<br>$\pm$<br>0.0049 | 0.7040<br>$\pm$<br>0.0056 | 0.1443 $\pm$<br>0.0203 | <0.0001                                    | <0.0001                                | <0.0001                                   |
|                     | thalamus        | 0.1445<br>$\pm$<br>0.0051 | 0.2775<br>$\pm$<br>0.0056 | 0.1308 $\pm$<br>0.0044 | <0.0001                                    | 0.1736                                 | <0.0001                                   |
|                     | hypothalamus    | 0.3153<br>$\pm$<br>0.0018 | 0.7588<br>$\pm$<br>0.0142 | 0.2043 $\pm$<br>0.0226 | <0.0001                                    | 0.0004                                 | <0.0001                                   |
| EM-2                | mesencephalon   | 0.1193<br>$\pm$<br>0.0034 | 0.2228<br>$\pm$<br>0.0026 | 0.1178 $\pm$<br>0.0049 | <0.0001                                    | 0.9571                                 | <0.0001                                   |
|                     | thalamus        | 0.3710<br>$\pm$<br>0.0015 | 0.5138<br>$\pm$<br>0.0071 | 0.3367 $\pm$<br>0.0025 | <0.0001                                    | 0.0002                                 | <0.0001                                   |
|                     | hypothalamus    | 0.2372<br>$\pm$<br>0.0117 | 0.4065<br>$\pm$<br>0.0054 | 0.1803 $\pm$<br>0.0223 | <0.0001                                    | 0.0406                                 | <0.0001                                   |

**Supplementary Table S2.** Effect of control, electrical stimulation tooth pulp, and URB597 on the CB1, CB2, and MOR mRNA expression levels in rat mesencephalon, thalamus, and hypothalamus. Data are presented as relative quantity ( $2^{\Delta\Delta C_t}$ )  $\pm$  SEM.

| Receptors | Brain structure | Control                   | Tooth pulp                | URB597                 | Control vs Tooth pulp<br><i>p</i> - value | Control vs URB597<br><i>p</i> - value | Tooth pulp vs URB597<br><i>p</i> - value |
|-----------|-----------------|---------------------------|---------------------------|------------------------|-------------------------------------------|---------------------------------------|------------------------------------------|
| CB1R      | mesencephalon   | 0.1678<br>$\pm$<br>0.0104 | 0.1678<br>$\pm$<br>0.0096 | 0.2258 $\pm$<br>0.0163 | >0.9999                                   | 0.0129                                | 0.0129                                   |
|           | thalamus        | 0.1147<br>$\pm$<br>0.0117 | 0.1103<br>$\pm$<br>0.0161 | 0.1703 $\pm$<br>0.0149 | 0.9753                                    | 0.0382                                | 0.0253                                   |
|           | hypothalamus    | 0.2045<br>$\pm$<br>0.0224 | 0.1640<br>$\pm$<br>0.0114 | 0.2552 $\pm$<br>0.0211 | 0.3132                                    | 0.1751                                | 0.0103                                   |
| CB2R      | mesencephalon   | 0.1425<br>$\pm$<br>0.0045 | 0.1343<br>$\pm$<br>0.0034 | 0.1285 $\pm$<br>0.0206 | 0.8866                                    | 0.7061                                | 0.9402                                   |
|           | thalamus        | 0.1315<br>$\pm$<br>0.0043 | 0.1252<br>$\pm$<br>0.0048 | 0.1132 $\pm$<br>0.0062 | 0.6676                                    | 0.0585                                | 0.2580                                   |
|           | hypothalamus    | 0.1922<br>$\pm$<br>0.0043 | 0.1652<br>$\pm$<br>0.0172 | 0.1337 $\pm$<br>0.0091 | 0.2543                                    | 0.0072                                | 0.1644                                   |
| MOR       | mesencephalon   | 0.2358<br>$\pm$<br>0.0035 | 0.3843<br>$\pm$<br>0.0153 | 0.1715 $\pm$<br>0.0080 | <0.0001                                   | 0.0012                                | <0.0001                                  |
|           | thalamus        | 0.1258<br>$\pm$<br>0.0181 | 0.1722<br>$\pm$<br>0.0188 | 0.0617 $\pm$<br>0.0115 | 0.1483                                    | 0.0367                                | 0.0007                                   |
|           | hypothalamus    | 0.0522<br>$\pm$<br>0.0068 | 0.0873<br>$\pm$<br>0.0045 | 0.0343 $\pm$<br>0.0048 | 0.0010                                    | 0.0846                                | <0.0001                                  |

**Supplementary Table S3.** Effect of control, electrical stimulation tooth pulp, and URB597 on the levels of AEA and 2-AG in mesencephalon, thalamus and hypothalamus in rats. AEA and 2-AG are presented as normalized concentration [pmol/g]  $\pm$  SEM.

| Signaling endocannabinoids | Brain structure | Control             | Tooth pulp          | URB597              | Control vs. Tooth pulp<br><i>p</i> - value | Control vs. URB597<br><i>p</i> - value | Tooth pulp vs. URB597<br><i>p</i> - value |
|----------------------------|-----------------|---------------------|---------------------|---------------------|--------------------------------------------|----------------------------------------|-------------------------------------------|
| AEA                        | mesencephalon   | 24.56 $\pm$ 2.52    | 22.34 $\pm$ 3.98    | 39.56 $\pm$ 3.33    | 0.8854                                     | 0.0159                                 | 0.0062                                    |
|                            | thalamus        | 34.12 $\pm$ 4.55    | 24.20 $\pm$ 3.07    | 51.61 $\pm$ 4.81    | 0.2505                                     | 0.0261                                 | 0.0010                                    |
|                            | hypothalamus    | 38.95 $\pm$ 4.93    | 32.47 $\pm$ 4.22    | 58.08 $\pm$ 6.22    | 0.6586                                     | 0.0490                                 | 0.0087                                    |
| 2-AG                       | mesencephalon   | 0.2450 $\pm$ 0.0466 | 0.1150 $\pm$ 0.0118 | 0.3083 $\pm$ 0.0409 | 0.0574                                     | 0.4547                                 | 0.0051                                    |
|                            | thalamus        | 0.2533 $\pm$ 0.1117 | 0.3633 $\pm$ 0.0820 | 0.4450 $\pm$ 0.0593 | 0.6524                                     | 0.2938                                 | 0.7877                                    |
|                            | hypothalamus    | 0.4500 $\pm$ 0.1131 | 0.5817 $\pm$ 0.0734 | 0.3967 $\pm$ 0.0823 | 0.5757                                     | 0.9106                                 | 0.3493                                    |

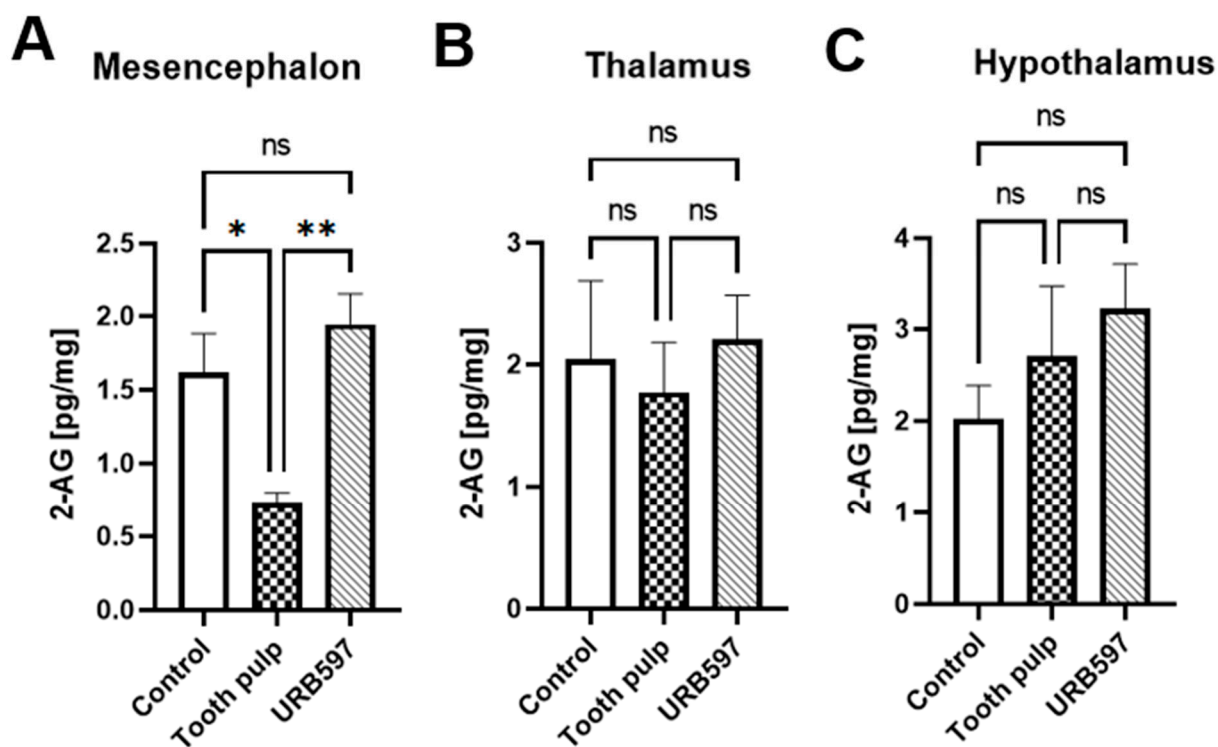

**Supplementary Figure S1.** 2-AG concentration normalized to milligram of total protein concentration in weighed tissue in controls and after tooth pulp and URB597 treatment. The data represent mean  $\pm$  SEM of 6 rats per group. Statistical significance was assessed using one-way ANOVA and a post-hoc multiple comparison Tukey test. Asterisks denote significance level (\* <0.05, \*\*<0.01, \*\*\* <0.001, \*\*\*\* <0.0001, ns- not statistically significant).

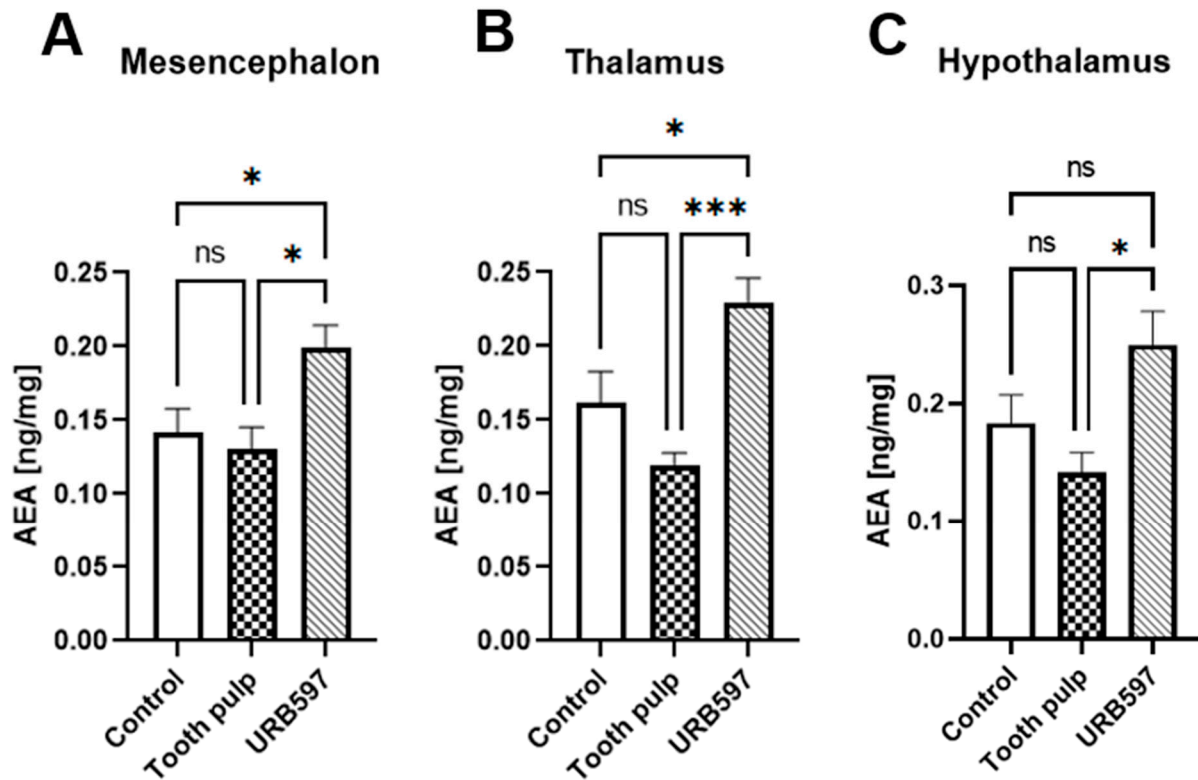

**Supplementary Figure S2.** AEA concentration normalized to milligram of total protein concentration in weighed tissue in controls and after tooth pulp and URB597 treatment. The data represent mean  $\pm$  SEM of 6 rats per group. Statistical significance was assessed using one-way ANOVA and a post-hoc multiple comparison Tukey test. Asterisks denote significance level (\* <0.05, \*\*<0.01, \*\*\* <0.001, \*\*\*\* <0.0001, ns- not statistically significant).
